# Supplementary material
Source: publisher figshare collection journal article supplement (https://acs.figshare.com/ndownloader/files/25741931)
Supplement: Supplementary file 1 [file 25741931]

## **Supporting Information**

**Efficient photodynamic therapy against Gram-positive and Gram-negative bacteria using Rose Bengal encapsulated metallocatanionic vesicles in presence of visible light**

**Bunty Sharma, Vipul Thakur, Gurpreet Kaur\* and Ganga Ram Chaudhary\***

Department of Chemistry and Centre of Advanced Studies in Chemistry, Panjab University,  
Chandigarh

\*Corresponding authors: (Gurpreet Kaur and GR Chaudhary)

Tel.: +91-9872800434, +91-2534431

E-mail address: [gurpreet14@pu.ac.in](mailto:gurpreet14@pu.ac.in)

[grc22@pu.ac.in](mailto:grc22@pu.ac.in)

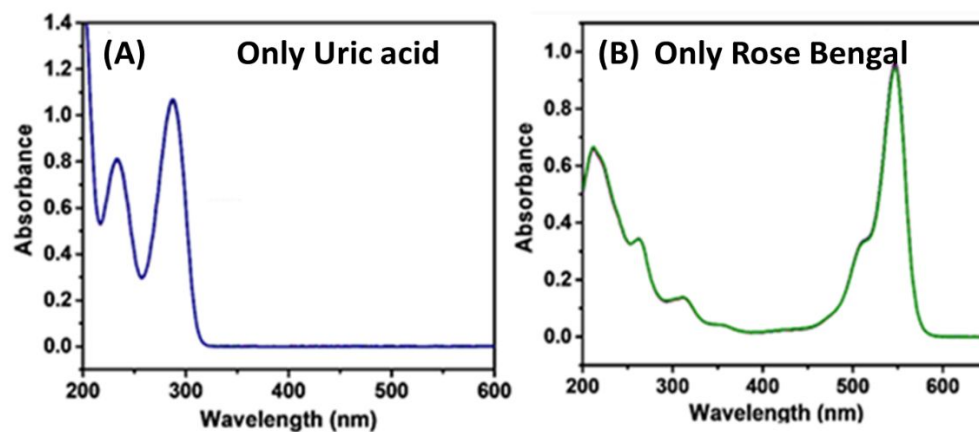

**Figure S1.** Light irradiation (for 12 min) effect on (A) only Uric Acid (UA), (B) Rose Bengal (RB) absorbance.

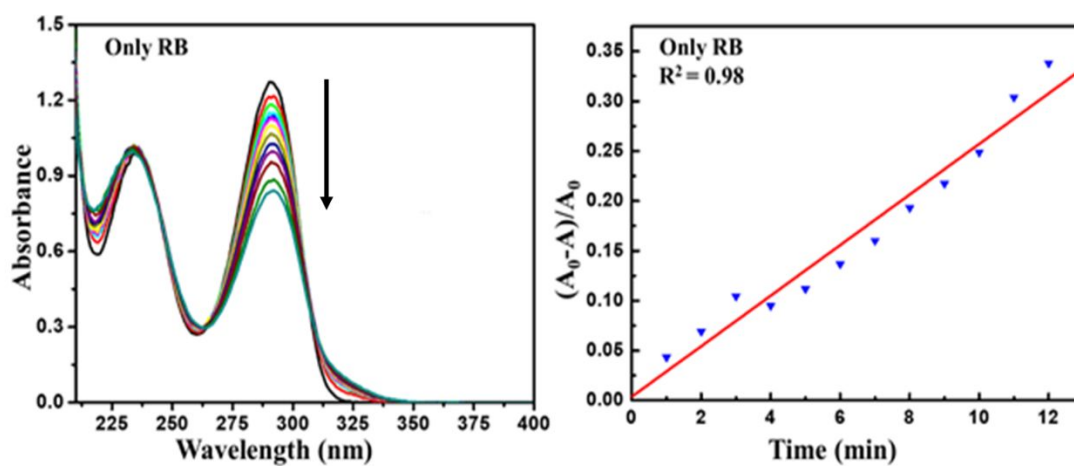

**Figure S2.** Graph of UA quenching with only irradiation of UA with only RB solution

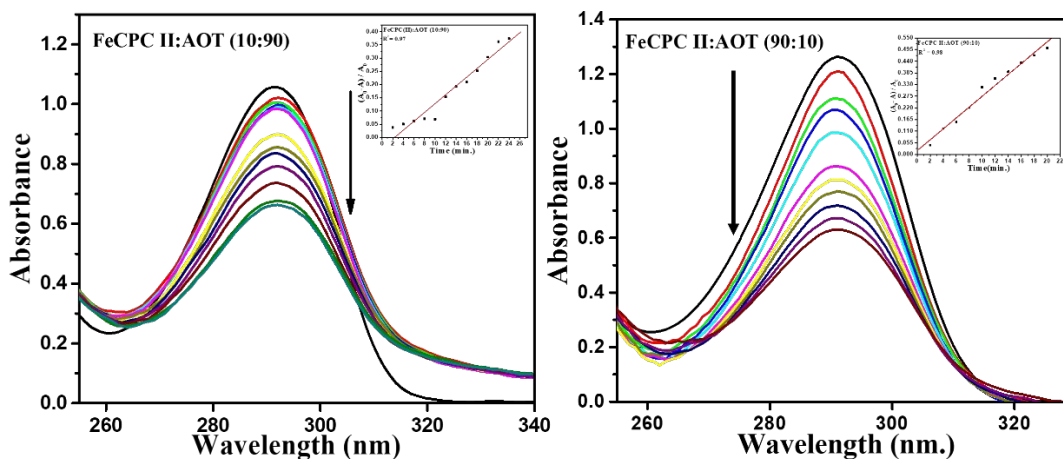

**Figure S3.** Spectral variation of Uric Acid (UA = 100  $\mu$ M) with a mixture of RB (10  $\mu$ M) and FeCPCII:AOT (100  $\mu$ M ) fractions illumination with laser light in aqueous buffer solution.
